# Supplementary material for: Practice Patterns and Barriers for Intravenous Thrombolysis: A Survey of Neurologists in Saudi Arabia
Source: Hindawi journal article supplement (doi:10.1155/2018/1695014), 2018-01-01
Supplement: f1 [file 1695014.f1.pdf]

## 1- Survey

1. During your residency or fellowship training, Did you ever prescribe IV-tPA?

- Yes
- No

2. How many times have you prescribed/recommended IV-tPA for patients with acute ischemic stroke (in your post-residency practice )?

- I have never prescribed IV-tPA
- I have prescribed IV-tPA in the past > 2 years ago
- I have prescribed IV-tPA once in the past two years
- I have prescribed IV-tPA 1-3 times in the past year
- I have prescribed IV-tPA 4-6 times in the past year
- I have prescribed IV-tPA 7-10 times in the past year
- I have prescribed IV-tPA >10 times in the past year

3. In which city do you work?

- Riyadh
- Jeddah
- Dammam
- Madinah
- Makkah
- Al – Khubar
- Al – Ahsaa
- Al – Taif
- Abha
- Gizan
- Qassim
- Al – Baha
- Tabouk
- Al – Dahran
- Al - Qateef
- Al – Jubail
- Bisha
- Other (please specify)

4. Where do you practice?

- University hospitals
- National guard hospitals
- Military hospitals
- Ministry of health tertiary hospitals
- Ministry of health secondary hospitals
- Self-operating hospitals belonging to ministry of health
- Private sector
- Rural center
- King Faisal Specialist Hospital & Research Center
- Armed Forces Hospitals
- Other (please specify)

5. What is your job title?

- Neurology consultant
- Pediatric neurologist
- Stroke fellow
- Neurology registrar
- Neurology senior registrar

6. Which of the potential IV-tPA exclusion criteria (based on 2015 AHA guideline or tPA package insert) **WOULD NOT** necessarily prevent you from administering IV-tPA to a patient with a perceived disabling Stroke (provided other inclusion/exclusion criteria are met)? \*multiple answers allowed.

- None. I don't "bend" any of the guideline exclusion criteria
- Minor stroke (NIHSS<5)
- Rapidly improving stroke symptoms
- Ischemic stroke within 3 months
- Significant head trauma within 3 months
- Seizure at onset
- Intracranial or intraspinal surgery in previous 3 months
- Blood pressure >185/110 mmHg despite appropriate treatment efforts to control it
- Current use of anticoagulant with INR>1.7 or PT>15
- Receiving heparin within 48 hours with aPTT value >40 (abnormal)
- Receiving direct thrombin inhibitor within 48 hours with normal coagulation profile (PT, PTT, INR, Platelet count, clotting time, thrombin time, factor Xa activity assays)
- Receiving direct thrombin inhibitor or factor Xa inhibitor within 48 hours with unknown coagulation profile (PT, PTT, INR, Platelet count, clotting time, thrombin time, factor Xa activity assays)
- Received therapeutic LMWH within 24 hours
- Major extracranial trauma within 14 days
- Active internal bleeding
- Previous ICH
- Symptoms suggestive of subarachnoid hemorrhage (SAH)
- Intracranial unruptured unsecured aneurysm
- Intracranial remotely ruptured, secured aneurysm
- Platelet count <100'000
- CT showing hypodensity >1/3 of the Cerebral hemisphere
- ST elevated MI in previous 3 months
- NSTEMI in previous 3 months
- Gastrointestinal hemorrhage in previous 21 days
- Genitourinary hemorrhage in previous 21 days
- Glucose < 50 mg/dl (deficits persist after glucose correction)
- Known brain tumor
- Intracranial AVM (arteriovenous malformation)
- Arterial puncture at non-compressible site within 7 days
- Pregnancy

7. What additional ECASS III contraindication criteria **WOULD NOT** necessarily prevent you from administering IV-tPA to patient with a disabling stroke in the 3-4.5 hour treatment window (provided other inclusion/exclusion criteria are met)

\*multiple answers allowed

- None. I don't "bend" any of the ECASS III criteria.
- Age older than 80 years.
- History of both diabetes and prior stroke
- Warfarin use regardless of the INR value
- NIHSS >25

8. In your experience, what is the most common barrier that interferes with administering IV-tPA in Acute stroke setting?

\*multiple answers allowed (Not more than three)

- Late presentation to ER
- Delayed referral from ER to Neurologist

|                                                                                                                                                                                                                                                                                                                                                                                                                                               |       |        |       |       |       |       |       |       |        |       |       |  |
|-----------------------------------------------------------------------------------------------------------------------------------------------------------------------------------------------------------------------------------------------------------------------------------------------------------------------------------------------------------------------------------------------------------------------------------------------|-------|--------|-------|-------|-------|-------|-------|-------|--------|-------|-------|--|
| <ul style="list-style-type: none"> <li>• Unclear time of onset</li> <li>• Patient or Family declining IV-tPA</li> <li>• Impaired coagulation profile, due to disease or drugs, etc</li> <li>• Failure to control high blood pressure.</li> <li>• Absence of IV-tPA, or delay in IV-tPA preparation.</li> <li>• Delay in obtaining CT brain</li> <li>• Other (please specify)</li> </ul>                                                       |       |        |       |       |       |       |       |       |        |       |       |  |
| <p>9. Do you offer IV-tPA to patients taking dabigatran who have a disabling stroke, meet inclusion/exclusion criteria for IV-tPA, and have normal PT, PTT, INR, but have unknown time from the last dose?</p> <ul style="list-style-type: none"> <li>• Yes, even if there are mild renal function abnormalities.</li> <li>• Yes, but only if the renal function is normal.</li> <li>• No.</li> </ul>                                         |       |        |       |       |       |       |       |       |        |       |       |  |
| <p>10. In a woman of childbearing age who presents with a disabling stroke and otherwise meets IV-tPA including/excluding criteria, Do you routinely wait for pregnancy test result before administering IV-tPA?</p> <ul style="list-style-type: none"> <li>• Yes</li> <li>• No</li> </ul>                                                                                                                                                    |       |        |       |       |       |       |       |       |        |       |       |  |
| <p>11. In patients receiving warfarin, up to what INR do you feel comfortable administering IV-tPA?</p> <table border="0"> <tr> <td>• 1.4</td> <td>• 1.8</td> <td>• 3.0</td> </tr> <tr> <td>• 1.5</td> <td>• 1.9</td> <td>• 3.5</td> </tr> <tr> <td>• 1.6</td> <td>• 2.0</td> <td>• &gt;3.5</td> </tr> <tr> <td>• 1.7</td> <td>• 2.5</td> <td></td> </tr> </table> <ul style="list-style-type: none"> <li>• Other (please specify)</li> </ul> | • 1.4 | • 1.8  | • 3.0 | • 1.5 | • 1.9 | • 3.5 | • 1.6 | • 2.0 | • >3.5 | • 1.7 | • 2.5 |  |
| • 1.4                                                                                                                                                                                                                                                                                                                                                                                                                                         | • 1.8 | • 3.0  |       |       |       |       |       |       |        |       |       |  |
| • 1.5                                                                                                                                                                                                                                                                                                                                                                                                                                         | • 1.9 | • 3.5  |       |       |       |       |       |       |        |       |       |  |
| • 1.6                                                                                                                                                                                                                                                                                                                                                                                                                                         | • 2.0 | • >3.5 |       |       |       |       |       |       |        |       |       |  |
| • 1.7                                                                                                                                                                                                                                                                                                                                                                                                                                         | • 2.5 |        |       |       |       |       |       |       |        |       |       |  |
| <p>12. Is there an NIHSS below which you usually do not offer IV-tPA (or dose this depend on perceived disability of the deficit)?</p> <ul style="list-style-type: none"> <li>• 1</li> <li>• 2</li> <li>• 3</li> <li>• 4</li> <li>• 5</li> <li>• 6</li> <li>• perceived disability of the deficit</li> <li>• Other (please specify)</li> </ul>                                                                                                |       |        |       |       |       |       |       |       |        |       |       |  |
| <p>13. Is there an NIHSS above which you do not offer IV-tPA ?</p> <ul style="list-style-type: none"> <li>• &gt;25</li> <li>• &gt;30</li> <li>• &gt;35</li> <li>• &gt;40</li> <li>• I do not restrict fibrinolysis on an upper NIHSS score.</li> <li>• Other (please specify)</li> </ul>                                                                                                                                                      |       |        |       |       |       |       |       |       |        |       |       |  |

Supplementary Table 1. City-wise distribution of neurologists who participated showing tPA administration per city.

| City                  | Response (%) | No. of Responses | tPA given (Yes or No) |
|-----------------------|--------------|------------------|-----------------------|
| Riyadh                | 56.80        | 71               | Yes                   |
| Jeddah                | 19.20        | 24               | Yes                   |
| Dammam                | 3.20         | 4                | Yes                   |
| Madinah               | 3.20         | 4                | Yes                   |
| Makkah                | 3.20         | 4                | Yes                   |
| Al-khubar             | 3.20         | 4                | Yes                   |
| Al-Ahsaa              | 1.60         | 2                | <b>No</b>             |
| Al-Taif               | 2.40         | 3                | Yes                   |
| Abha                  | 1.60         | 2                | Yes                   |
| Gizan                 | 1.60         | 2                | Yes                   |
| Alkharj               | 0.80         | 1                | <b>No</b>             |
| Al-Qateef             | 1.60         | 2                | <b>No</b>             |
| Al-Jubail             | 0.80         | 1                | Yes                   |
| Khamees Mesheet       | 0.80         | 1                | Yes                   |
| <b>Total Answered</b> |              | <b>125</b>       |                       |
| <b>Total Skipped</b>  |              | <b>23</b>        |                       |
